# Supplementary material for: Early detection of autism using digital behavioral phenotyping
Source: PubMed Central journal article supplement (PMC10579093; doi:10.1038/s41591-023-02574-3), 2023-10-02

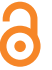

---

# Early detection of autism using digital behavioral phenotyping

---

In the format provided by the authors and unedited

# Table of contents

**Supplementary Information Table S1:** Table showing the sensitivity, specificity, and (corrected) Positive Predictive Values (PPV) and Negative Predictive Values (NPV) for different operating points of the Receiver Operating Curve.

**Supplementary Information Figure S1.** Importance plots of the app variables to the model's prediction.

**Supplementary Information Table S1: Table showing the sensitivity, specificity, and (corrected) Positive Predictive Values (PPV) and Negative Predictive Values (NPV) for different operating points of the Receiver Operating Curve.** All app variables were used in these analyses, and the model is trained to differentiate autistic (N=49) from neurotypical (N=328) participants. The red and green rows correspond to the operating point that optimizes the Youden and  $F_2$  measures, respectively.

| Index threshold | Threshold | Sensitivity (%) | Specificity (%) | PPV (%) | NPV (%) | PPV Adjusted (%) | NPV Adjusted (%) |
|-----------------|-----------|-----------------|-----------------|---------|---------|------------------|------------------|
| 1               | 1.0       | 34.7            | 98.5            | 77.3    | 32.6    | 91.0             | 98.6             |
| 2               | 0.999     | 34.7            | 97.9            | 70.8    | 25.7    | 90.9             | 98.6             |
| 3               | 0.998     | 36.7            | 97.3            | 66.7    | 22.1    | 91.1             | 98.6             |
| 4               | 0.997     | 40.8            | 97.0            | 66.7    | 22.1    | 91.6             | 98.7             |
| 5               | 0.996     | 46.9            | 97.0            | 69.7    | 24.6    | 92.4             | 98.9             |
| 6               | 0.989     | 51.0            | 97.0            | 71.4    | 26.2    | 93.0             | 98.9             |
| 7               | 0.986     | 53.1            | 96.3            | 68.4    | 23.6    | 93.2             | 99.0             |
| 8               | 0.961     | 61.2            | 96.3            | 71.4    | 26.2    | 94.3             | 99.2             |
| 9               | 0.957     | 61.2            | 96.0            | 69.8    | 24.7    | 94.3             | 99.1             |
| 10              | 0.954     | 65.3            | 96.0            | 71.1    | 25.9    | 94.9             | 99.2             |
| 11              | 0.951     | 65.3            | 95.4            | 68.1    | 23.3    | 94.8             | 99.2             |
| 12              | 0.935     | 65.3            | 94.2            | 62.7    | 19.3    | 94.8             | 99.2             |
| 13              | 0.932     | 65.3            | 93.6            | 60.4    | 17.8    | 94.8             | 99.2             |
| 14              | 0.899     | 65.3            | 92.4            | 56.1    | 15.4    | 94.7             | 99.2             |
| 15              | 0.898     | 67.3            | 92.1            | 55.9    | 15.3    | 95.0             | 99.3             |
| 16              | 0.895     | 69.4            | 92.1            | 56.7    | 15.7    | 95.3             | 99.3             |
| 17              | 0.879     | 69.4            | 91.2            | 54.0    | 14.3    | 95.2             | 99.3             |
| 18              | 0.858     | 71.4            | 91.2            | 54.7    | 14.6    | 95.5             | 99.3             |
| 19              | 0.848     | 71.4            | 90.5            | 53.0    | 13.8    | 95.5             | 99.3             |
| 20              | 0.834     | 73.5            | 90.5            | 53.7    | 14.2    | 95.8             | 99.4             |
| 21              | 0.777     | 73.5            | 89.9            | 52.2    | 13.4    | 95.8             | 99.4             |
| 22              | 0.775     | 75.5            | 89.9            | 52.9    | 13.8    | 96.1             | 99.4             |
| 23              | 0.765     | 75.5            | 89.3            | 51.4    | 13.1    | 96.1             | 99.4             |
| 24              | 0.755     | 77.6            | 89.3            | 52.1    | 13.4    | 96.4             | 99.5             |
| 25              | 0.657     | 77.6            | 86.3            | 45.8    | 10.7    | 96.3             | 99.5             |

|                     |       |      |      |      |      |      |      |
|---------------------|-------|------|------|------|------|------|------|
| 26                  | 0.654 | 79.6 | 86.3 | 46.4 | 11.0 | 96.6 | 99.5 |
| 27                  | 0.653 | 79.6 | 86.0 | 45.9 | 10.8 | 96.6 | 99.5 |
| 28                  | 0.65  | 81.6 | 86.0 | 46.5 | 11.0 | 96.9 | 99.5 |
| 29                  | 0.607 | 81.6 | 83.8 | 43.0 | 9.7  | 96.8 | 99.5 |
| 30                  | 0.579 | 83.7 | 83.8 | 43.6 | 9.9  | 97.2 | 99.6 |
| 31                  | 0.471 | 83.7 | 82.0 | 41.0 | 9.0  | 97.1 | 99.6 |
| 32                  | 0.466 | 85.7 | 82.0 | 41.6 | 9.2  | 97.5 | 99.6 |
| 33 ( $F_2$ optimal) | 0.382 | 85.7 | 80.8 | 40.0 | 8.7  | 97.4 | 99.6 |
| 34 (Youden optimal) | 0.378 | 87.8 | 80.8 | 40.6 | 8.8  | 97.8 | 99.7 |
| 35                  | 0.366 | 87.8 | 80.2 | 39.8 | 8.6  | 97.8 | 99.7 |
| 36                  | 0.342 | 87.8 | 78.7 | 38.1 | 8.0  | 97.7 | 99.7 |
| 37                  | 0.336 | 89.8 | 78.7 | 38.6 | 8.2  | 98.1 | 99.7 |
| 38                  | 0.182 | 89.8 | 70.7 | 31.4 | 6.1  | 97.9 | 99.7 |
| 39                  | 0.18  | 89.8 | 70.1 | 31.0 | 6.0  | 97.9 | 99.7 |
| 40                  | 0.179 | 91.8 | 69.8 | 31.2 | 6.1  | 98.3 | 99.8 |
| 41                  | 0.124 | 91.8 | 67.7 | 29.8 | 5.7  | 98.2 | 99.7 |
| 42                  | 0.119 | 91.8 | 67.1 | 29.4 | 5.6  | 98.2 | 99.7 |
| 43                  | 0.097 | 91.8 | 66.5 | 29.0 | 5.5  | 98.2 | 99.7 |
| 44                  | 0.094 | 91.8 | 65.9 | 28.7 | 5.4  | 98.2 | 99.7 |
| 45                  | 0.093 | 91.8 | 65.5 | 28.5 | 5.4  | 98.2 | 99.7 |
| 46                  | 0.092 | 93.9 | 65.5 | 28.9 | 5.5  | 98.6 | 99.8 |
| 47                  | 0.089 | 93.9 | 65.2 | 28.7 | 5.4  | 98.6 | 99.8 |
| 48                  | 0.088 | 93.9 | 64.3 | 28.2 | 5.3  | 98.6 | 99.8 |
| 49                  | 0.055 | 93.9 | 61.3 | 26.6 | 4.9  | 98.5 | 99.8 |
| 50                  | 0.046 | 93.9 | 60.7 | 26.3 | 4.8  | 98.5 | 99.8 |
| 51                  | 0.036 | 93.9 | 59.5 | 25.7 | 4.7  | 98.5 | 99.8 |
| 52                  | 0.033 | 93.9 | 58.8 | 25.4 | 4.6  | 98.5 | 99.8 |
| 53                  | 0.032 | 93.9 | 58.5 | 25.3 | 4.6  | 98.5 | 99.8 |
| 54                  | 0.028 | 93.9 | 56.7 | 24.5 | 4.4  | 98.4 | 99.8 |
| 55                  | 0.023 | 93.9 | 56.4 | 24.3 | 4.4  | 98.4 | 99.8 |
| 56                  | 0.021 | 93.9 | 55.8 | 24.1 | 4.3  | 98.4 | 99.8 |

|    |       |       |      |      |       |      |       |
|----|-------|-------|------|------|-------|------|-------|
| 57 | 0.02  | 93.9  | 55.5 | 24.0 | 4.3   | 98.4 | 99.8  |
| 58 | 0.019 | 93.9  | 54.9 | 23.7 | 4.2   | 98.4 | 99.8  |
| 59 | 0.014 | 93.9  | 54.0 | 23.4 | 4.2   | 98.3 | 99.8  |
| 60 | 0.013 | 93.9  | 53.4 | 23.1 | 4.1   | 98.3 | 99.8  |
| 61 | 0.011 | 93.9  | 53.0 | 23.0 | 4.1   | 98.3 | 99.8  |
| 62 | 0.01  | 95.9  | 52.4 | 23.2 | 4.1   | 98.9 | 99.8  |
| 63 | 0.009 | 95.9  | 51.5 | 22.8 | 4.0   | 98.8 | 99.8  |
| 64 | 0.007 | 95.9  | 50.9 | 22.6 | 4.0   | 98.8 | 99.8  |
| 65 | 0.005 | 96.0  | 48.0 | 22.0 | 99.0  | 4.0  | 99.83 |
| 66 | 0.004 | 96.0  | 46.0 | 21.0 | 99.0  | 4.0  | 99.82 |
| 67 | 0.003 | 96.0  | 44.0 | 20.0 | 99.0  | 4.0  | 99.81 |
| 68 | 0.002 | 96.0  | 41.0 | 19.0 | 99.0  | 3.0  | 99.8  |
| 69 | 0.001 | 96.0  | 38.0 | 19.0 | 98.0  | 3.0  | 99.79 |
| 70 | 0.0   | 100.0 | 0.0  | 13.0 | 100.0 | 2.0  | 99.77 |

### Supplementary Information Figure S1. Importance plots of the app variables to the model's prediction.

The x-axis represents the variables range, with ticks on the left representing the missing variables. The y-axis represents the normalized SHAP values of that variable. Each point corresponds to the SHAP value of the corresponding variable for each of the participants from the neurotypical and autistic groups. This allows us to understand which ranges of the variables' values correspond to an increase or decrease of the model's prediction towards the autistic or neurotypical groups. SHAP values of participants #1 and #2, presented in the manuscript, are shown with large purple and red dots, and participants #3, #4, and #5, presented in the Extended Data Figure 3, are reported in grey, green, and sky-blue dots, respectively. The app variables are ordered by their global importance to the model.

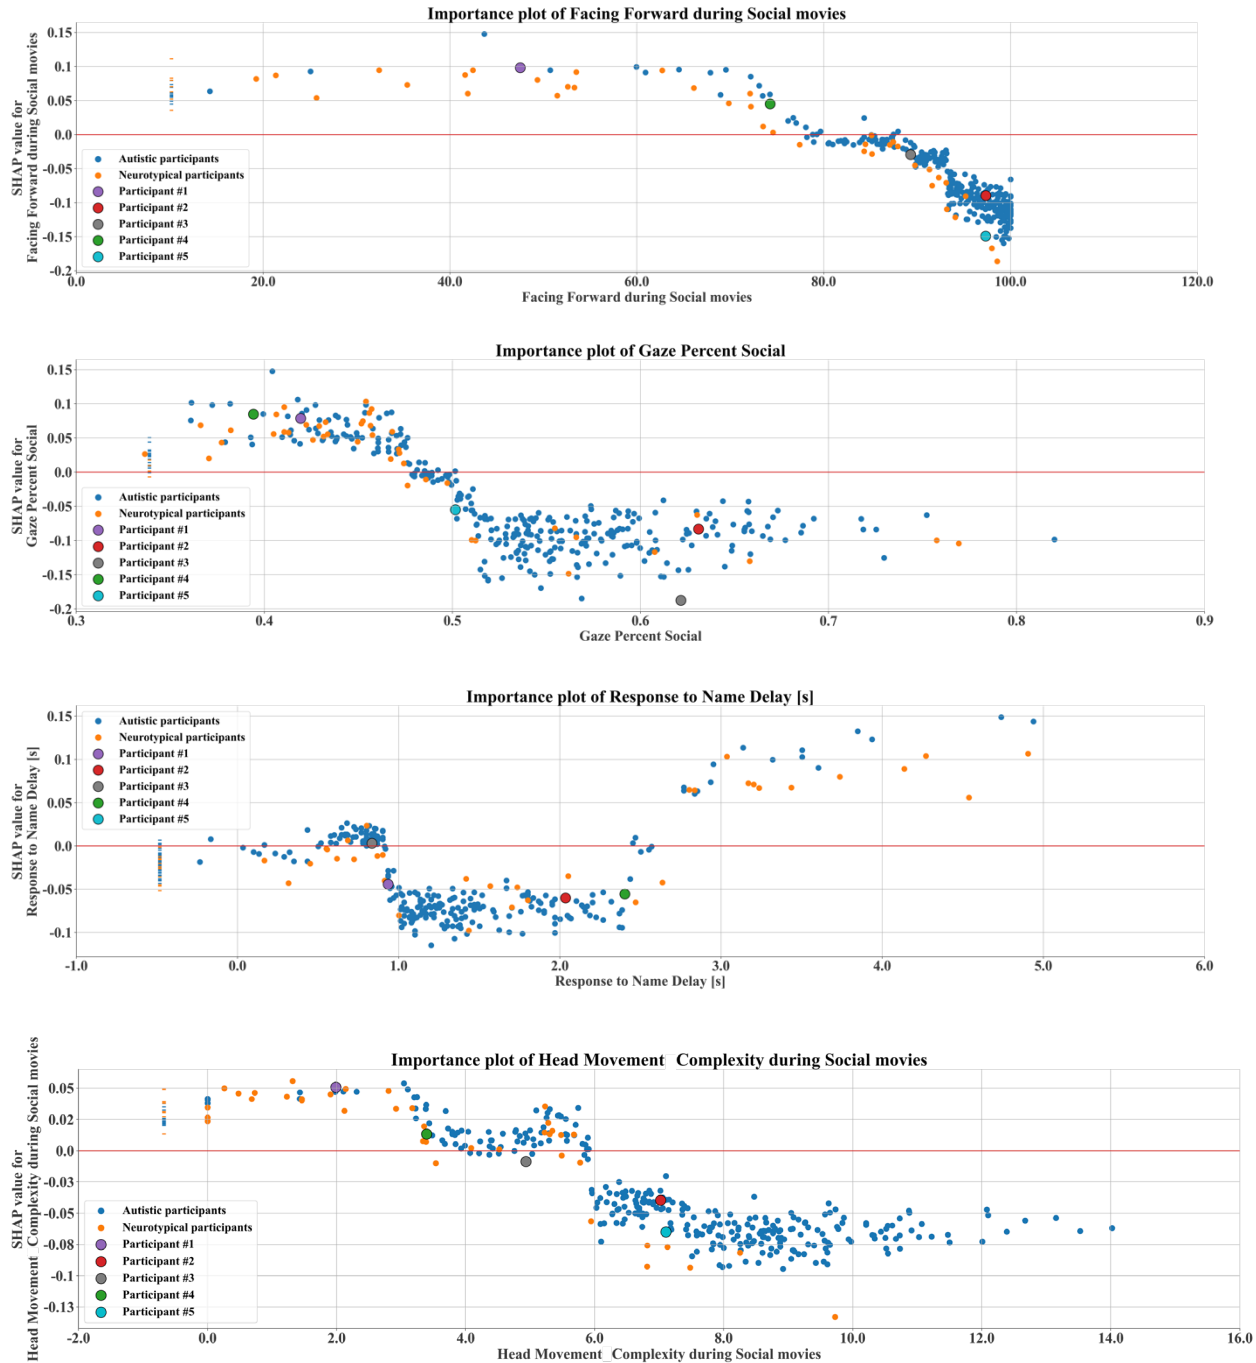

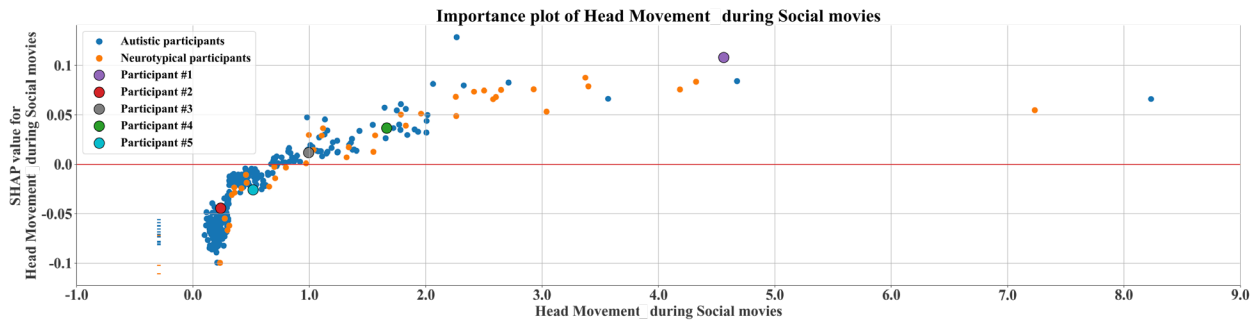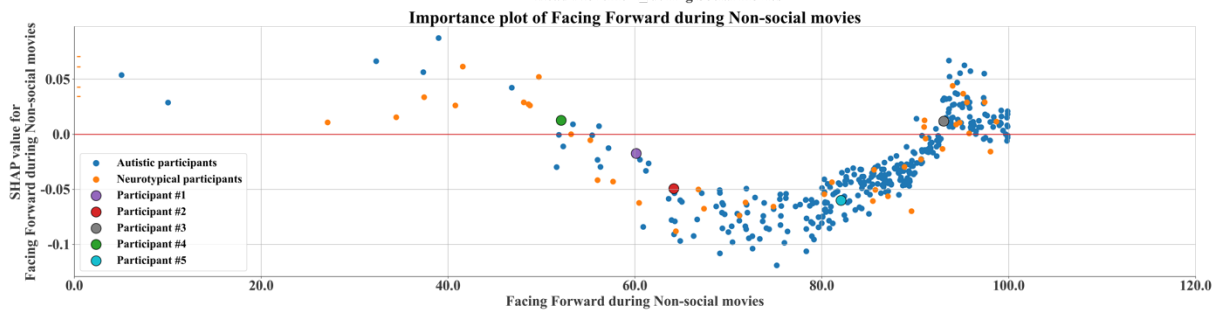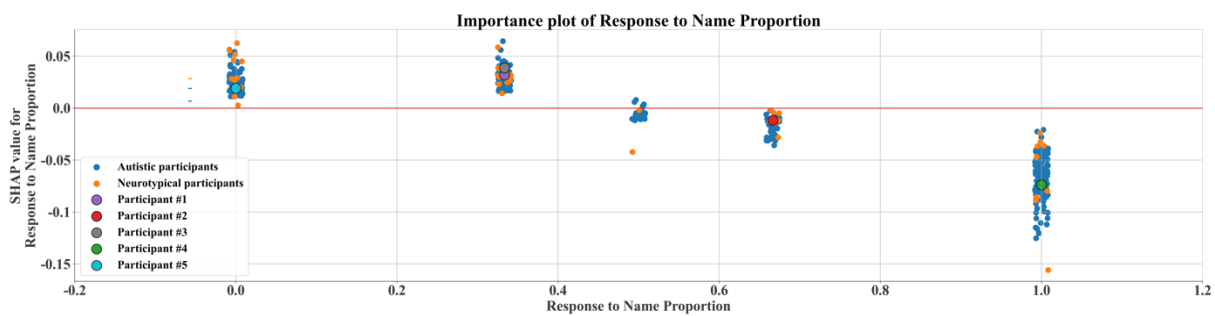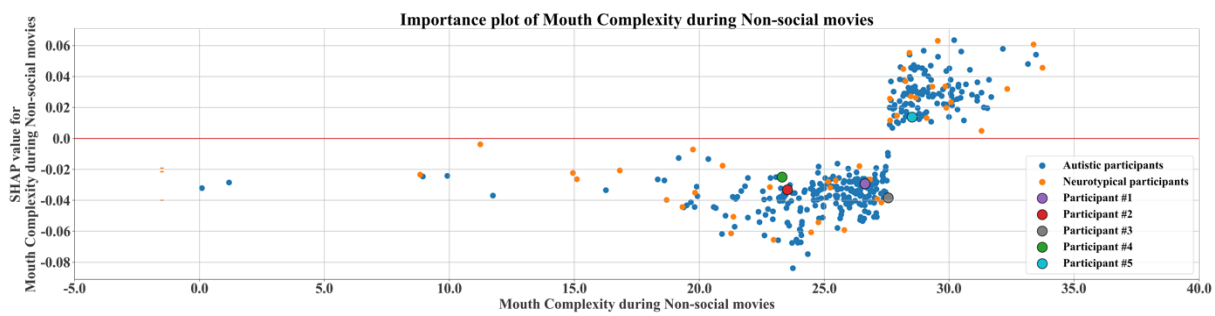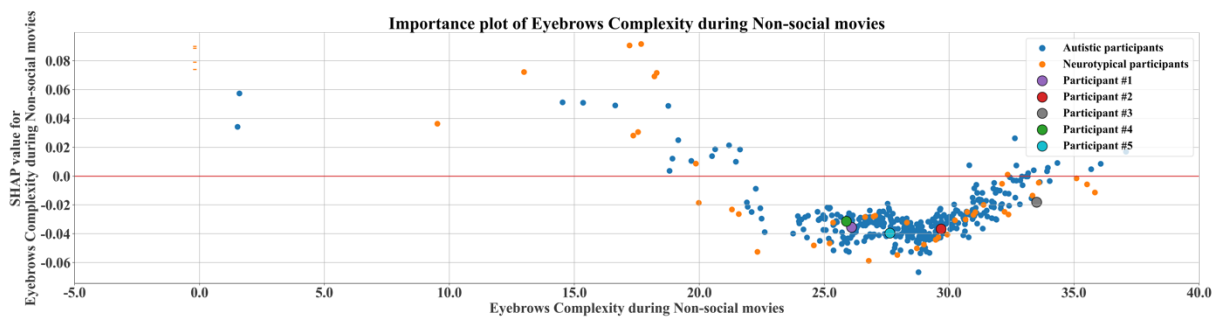

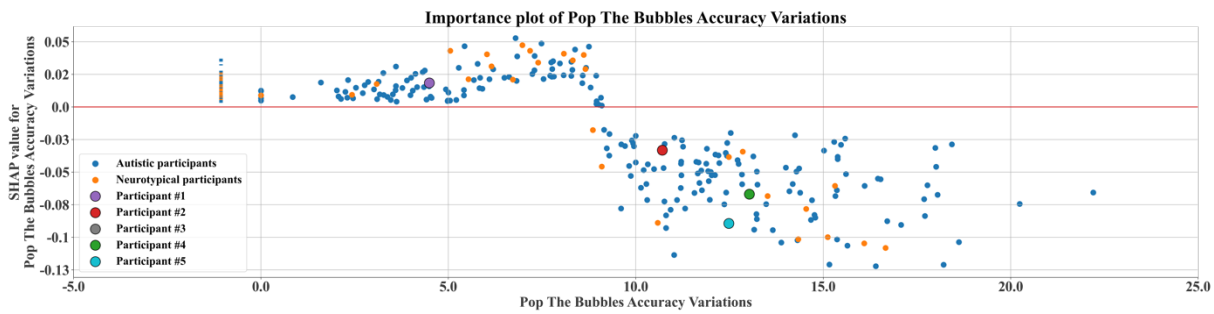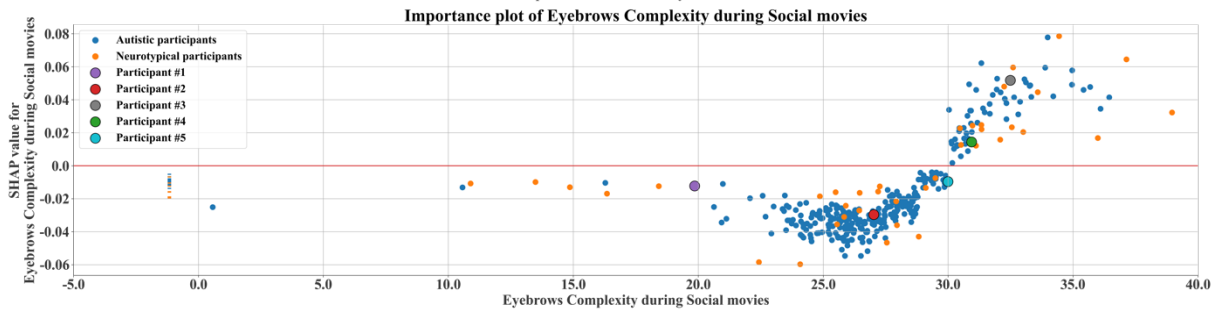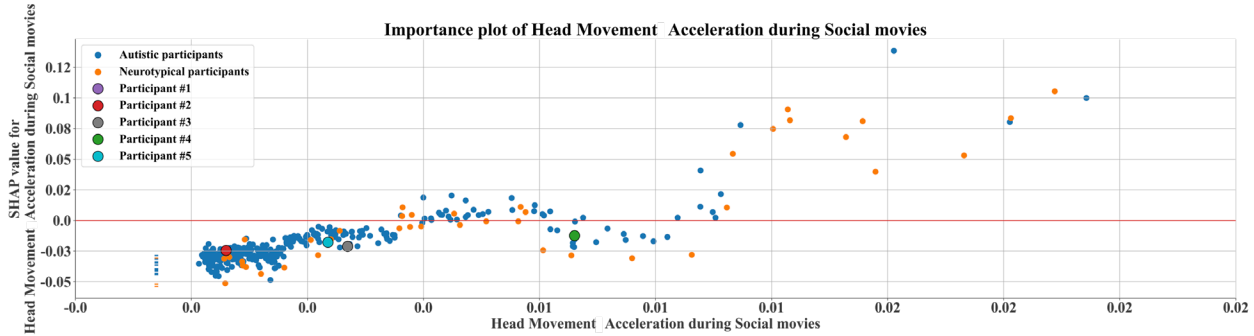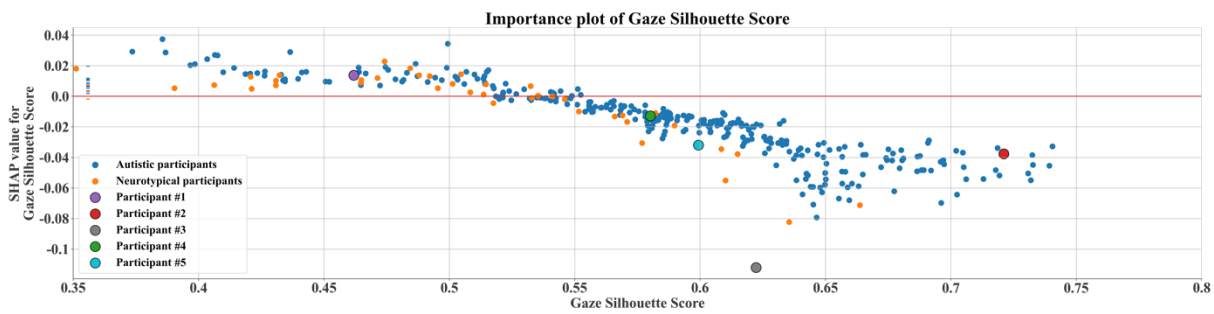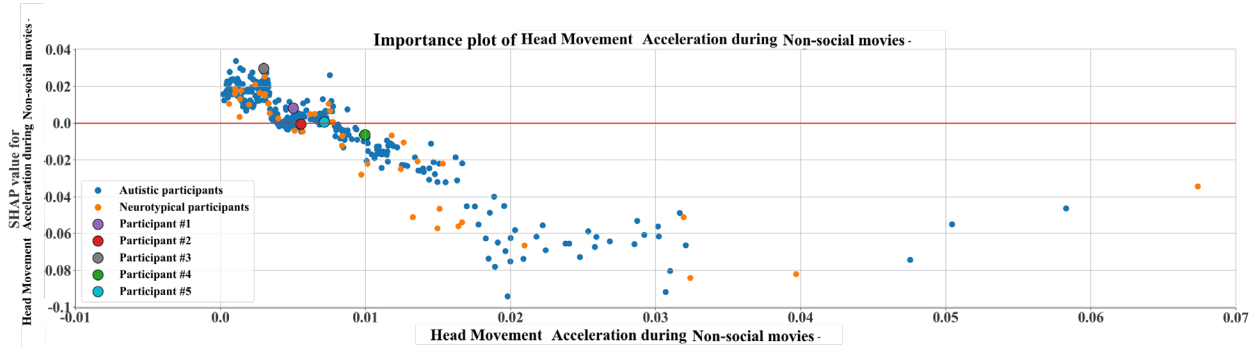



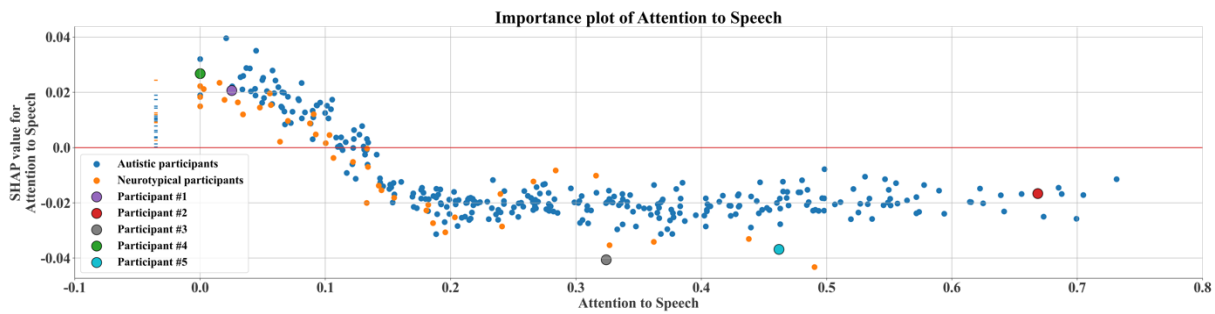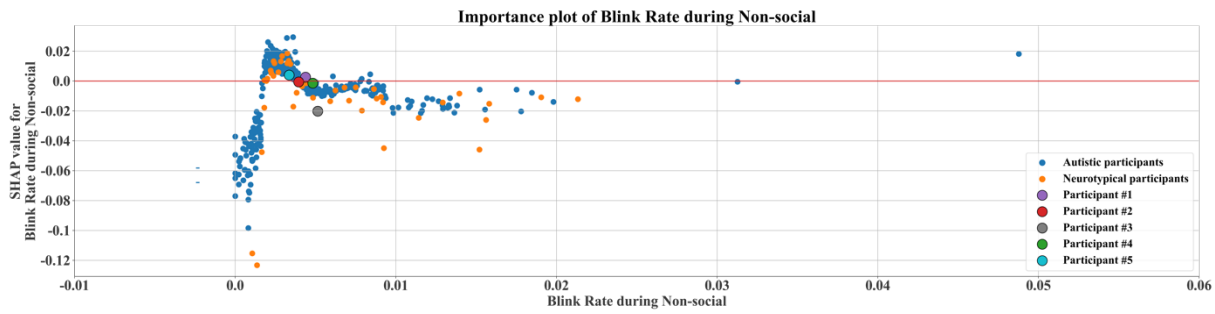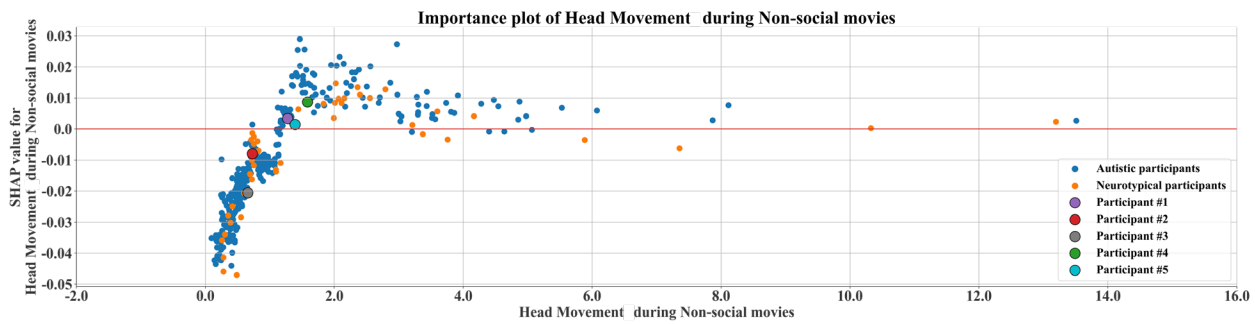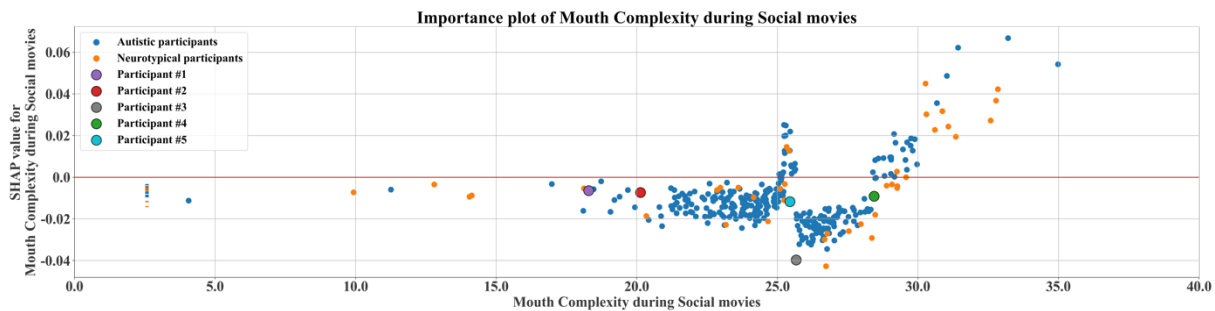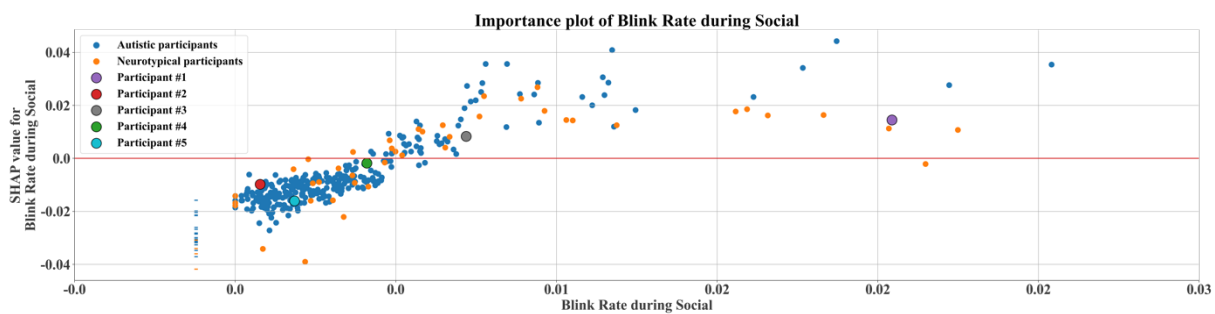

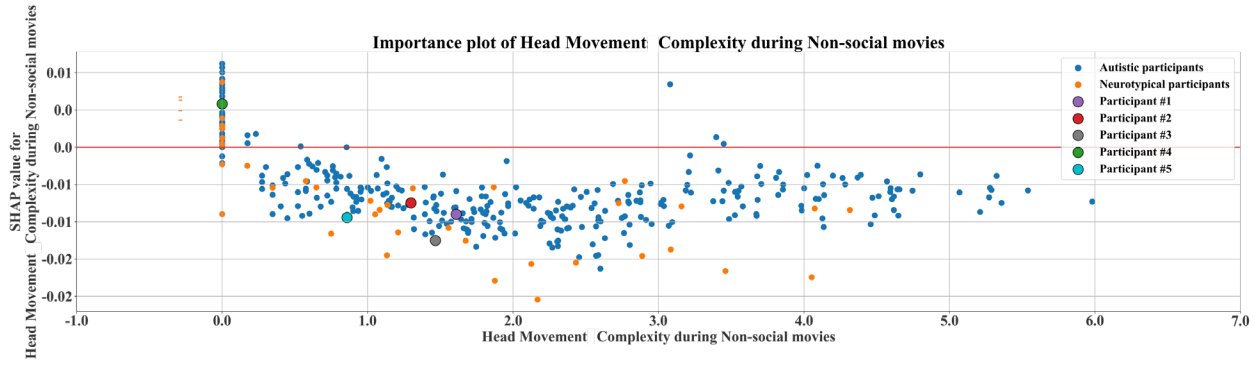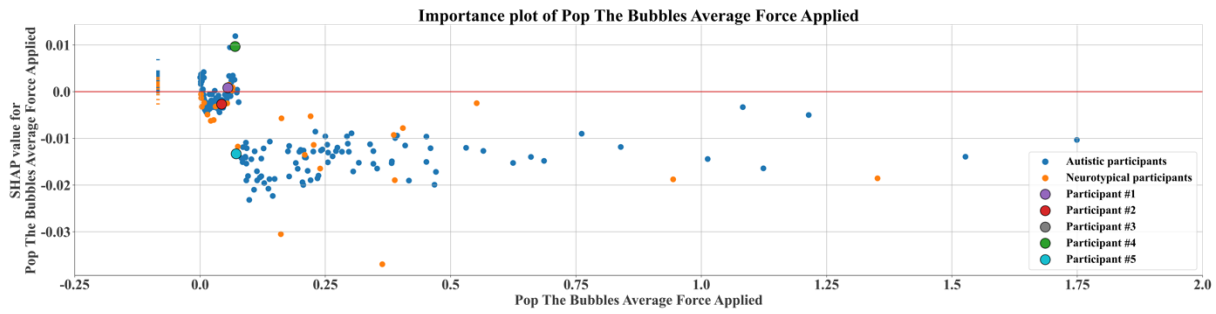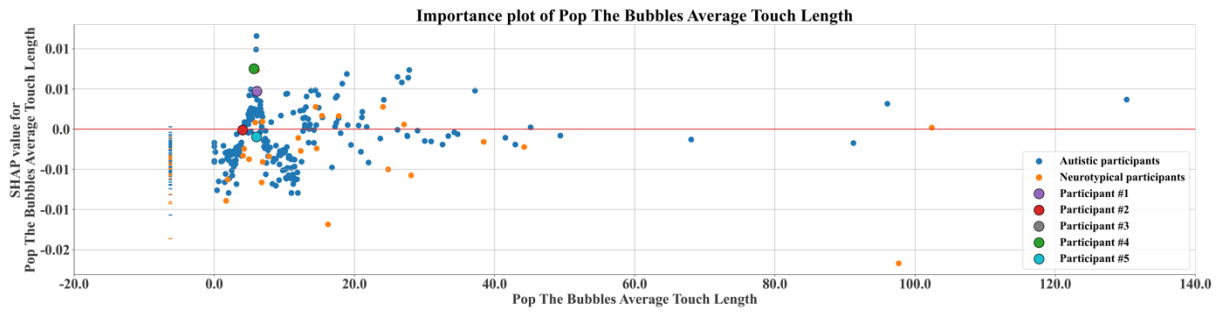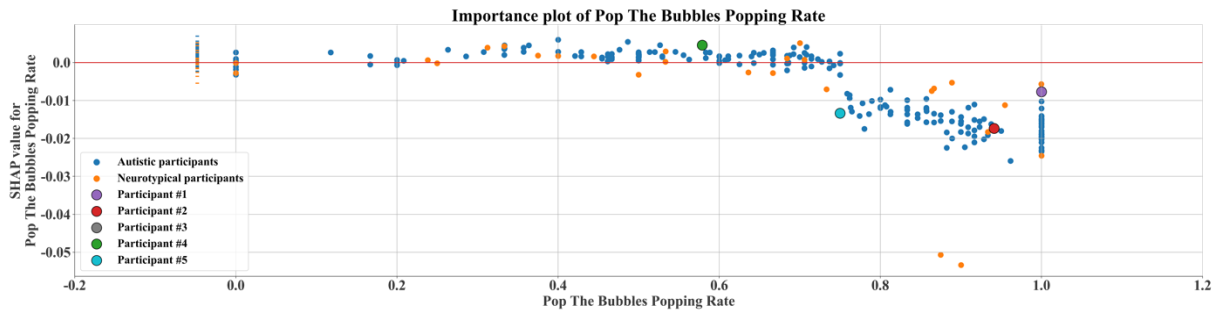

Supplement: 41591_2023_2574_MOESM1_ESM.pdf [file 41591_2023_2574_MOESM1_ESM.pdf]
